# Supplementary material
Source: MDPI journal article supplement (https://www.mdpi.com/2071-1050/13/24/13513)
Supplement: s1 [file s1]

# Supplementary Material

**Table S1.** Criteria to calculate morphometric parameters in the urban subbasin.

| Number                    | Morphometric parameter                              | Mathematical equation                                           | Variable description                                                                                  | References     |
|---------------------------|-----------------------------------------------------|-----------------------------------------------------------------|-------------------------------------------------------------------------------------------------------|----------------|
| <b>Geometry and shape</b> |                                                     |                                                                 |                                                                                                       |                |
| 1                         | Perimeter (P)                                       |                                                                 | Length of the drainage subbasin boundary                                                              | Horton [33]    |
| 2                         | Subbasin Length (L <sub>b</sub> )                   |                                                                 | The maximum length of the subbasin measured parallel to the main drainage line                        | Horton [33]    |
| 3                         | Total Area (A)                                      |                                                                 | The total area of the basin                                                                           | Horton [33]    |
| 4                         | Subbasin Width (W)                                  | $W = \frac{A}{L_b}$                                             | A = Subbasin area (km <sup>2</sup> )<br>L <sub>b</sub> = Subbasin length (km)                         | Horton [33]    |
| 5                         | Form factor (Kf)                                    | $Kf = \frac{A}{L_b^2}$                                          | A = Subbasin area (km <sup>2</sup> )<br>L <sub>b</sub> = Subbasin length (km)                         | Horton [33]    |
| 6                         | Circularity Ratio (R <sub>c</sub> )                 | $Rc = \frac{4 \pi A}{P^2}$                                      | P = Subbasin perimeter (km)<br>A = Subbasin area (km <sup>2</sup> )<br>π = Mathematical constant      | Miller [35]    |
| 7                         | Gravelius compactness coefficient (G <sub>c</sub> ) | $Gc = \frac{P}{2\sqrt{\pi A}} = \frac{0.28 \times P}{\sqrt{A}}$ | P = Subbasin perimeter (km)<br>A = Subbasin area (km <sup>2</sup> )<br>π = Mathematical constant      | Gravelius [37] |
| <b>Drainage network</b>   |                                                     |                                                                 |                                                                                                       |                |
| 8                         | Stream order (U)                                    |                                                                 | Hierarchical ordering                                                                                 | Horton [34]    |
| 9                         | Stream length (L <sub>u</sub> )                     |                                                                 | Length of the mainstream                                                                              | Horton [34]    |
| 10                        | Stream number (N <sub>u</sub> )                     |                                                                 | The total number of streams                                                                           | Horton [34]    |
| 11                        | Drainage density (D)                                | $D = \frac{\sum Lu}{A}$                                         | L <sub>u</sub> = Stream length (km)<br>A = Subbasin area (km <sup>2</sup> )                           | Horton [34]    |
| 12                        | Stream frequency (F <sub>s</sub> )                  | $Fs = \frac{Nc}{A}$                                             | N <sub>c</sub> = Total number of streams<br>A = Subbasin area (km <sup>2</sup> )                      | Horton [34]    |
| 13                        | Coefficient of torrentiality (C <sub>t</sub> )      | $Ct = \frac{N_1}{A}$                                            | N <sub>1</sub> = Total number of first-order streams<br>A = Subbasin area (km <sup>2</sup> )          | Strahler [38]  |
| 14                        | Mean slope of the mainstream (S <sub>med</sub> )    | $Smed = \frac{Bh}{Lu}$                                          | B <sub>h</sub> = Subbasin relief (km)<br>L <sub>u</sub> = Stream length (km).                         | Miller [35]    |
| 15                        | Time of concentration (T <sub>c</sub> )             | $Tc = (0.87 \frac{Lu^3}{Bh})^{0.385}$                           | B <sub>h</sub> = Subbasin relief (km)<br>L <sub>c</sub> = Length of the main channel in km            | Kirpich [39]   |
| <b>Relief aspects</b>     |                                                     |                                                                 |                                                                                                       |                |
| 16                        | Subbasin relief (B <sub>h</sub> )                   |                                                                 | The vertical distance between the lowest and highest points of the subbasin (m)                       | Schumm [36]    |
| 17                        | Hypsometric curve                                   |                                                                 | Area and elevation are plotted as functions of the total area and the total elevation of the subbasin | Schumm [36]    |

**Table S2.** Comparison between DEM and GCP obtained for altimetric ( $RMSE_z$ ) and planimetric ( $RMSE_{xy}$ ) accuracies.

| Points | Data (GCP)   |            |           | Data (DEM)   |            |       | Differences |                               |              |
|--------|--------------|------------|-----------|--------------|------------|-------|-------------|-------------------------------|--------------|
|        | $y_{PCT}$    | $x_{PCT}$  | $z_{PCT}$ | $y_o$        | $x_o$      | $z_o$ | $\Delta x$  | $\Delta y$                    | $\Delta z$   |
| 1      | 2,739,468.26 | 257,766.46 | 96.831    | 2,739,468.25 | 257,766.39 | 98.03 | 0.072       | 0.013                         | 1.199        |
| 2      | 2,739,476.18 | 257,743.76 | 96.663    | 2,739,476.18 | 257,743.73 | 97.64 | 0.032       | -0.005                        | 0.977        |
| 3      | 2,739,373.49 | 257,755.63 | 96.708    | 2,739,373.49 | 257,755.62 | 92.88 | 0.007       | 0.002                         | -3.828       |
| 4      | 2,739,425.62 | 257,860.27 | 96.476    | 2,739,425.62 | 257,860.26 | 95.92 | 0.007       | 0.001                         | -0.556       |
| 5      | 2,739,366.67 | 257,823.20 | 96.379    | 2,739,366.66 | 257,823.20 | 96.29 | 0.000       | 0.007                         | -0.089       |
| 6      | 2,739,325.19 | 257,841.66 | 95.122    | 2,739,325.18 | 257,841.65 | 95.87 | 0.008       | 0.007                         | 0.748        |
| 7      | 2,739,244.71 | 257,832.73 | 94.814    | 2,739,244.7  | 257,832.72 | 95.78 | 0.008       | 0.008                         | 0.966        |
| 8      | 2,739,227.59 | 257,807.40 | 95.118    | 2,739,227.59 | 257,807.39 | 95.74 | 0.010       | 0.001                         | 0.622        |
| 9      | 2,739,188.57 | 257,871.05 | 89.460    | 2,739,188.57 | 257,871.04 | 93.09 | 0.009       | 0.000                         | 3.630        |
| 10     | 2,739,235.57 | 257,892.10 | 86.941    | 2,739,235.56 | 257,892.09 | 89.88 | 0.007       | 0.005                         | 2.939        |
| 11     | 2,739,194.40 | 257,960.07 | 77.175    | 2,739,194.39 | 257,960.06 | 77.65 | 0.009       | 0.005                         | 0.475        |
| 12     | 2,739,194.40 | 257,960.07 | 77.168    | 2,739,194.4  | 257,960.06 | 77.65 | 0.008       | 0.004                         | 0.482        |
| 13     | 2,739,121.95 | 257,945.68 | 79.861    | 2,739,121.95 | 257,945.67 | 80.18 | 0.008       | 0.003                         | 0.319        |
| 14     | 2,739,097.32 | 257,983.55 | 74.932    | 2,739,097.32 | 257,983.55 | 75.44 | 0.000       | 0.002                         | 0.508        |
| 15     | 2,739,072.41 | 258,014.45 | 71.248    | 2,739,072.41 | 258,014.44 | 72.13 | 0.007       | 0.001                         | 0.882        |
| 16     | 2,739,171.19 | 258,011.69 | 71.330    | 2,739,171.18 | 258,011.69 | 71.61 | 0.001       | 0.005                         | 0.280        |
| 17     | 2,739,144.04 | 258,091.57 | 65.526    | 2,739,144.04 | 258,091.57 | 65.84 | 0.004       | 0.003                         | 0.314        |
| 18     | 2,739,212.72 | 258,116.49 | 71.747    | 2,739,212.71 | 258,116.49 | 72.54 | 0.003       | 0.008                         | 0.793        |
| 19     | 2,739,245.83 | 258,084.17 | 71.650    | 2,739,245.82 | 258,084.16 | 72.89 | 0.005       | 0.008                         | 1.240        |
| 20     | 2,739,264.46 | 258,062.25 | 72.503    | 2,739,264.45 | 258,062.24 | 73.42 | 0.007       | 0.009                         | 0.917        |
| 21     | 2,739,323.75 | 258,008.89 | 75.115    | 2,739,323.75 | 258,008.89 | 76.14 | 0.002       | 0.002                         | 1.025        |
| 22     | 2,739,340.40 | 257,934.69 | 78.177    | 2,739,340.4  | 257,934.68 | 80.86 | 0.005       | 0.001                         | 2.683        |
| 23     | 2,739,328.47 | 257,911.81 | 84.531    | 2,739,328.46 | 257,911.25 | 84.66 | 0.555       | 0.007                         | 0.129        |
| 24     | 2,739,403.12 | 257,884.09 | 89.656    | 2,739,403.12 | 257,884.08 | 89.83 | 0.008       | 0.000                         | 0.174        |
| 25     | 2,739,403.12 | 257,884.09 | 89.664    | 2,739,403.12 | 257,884.08 | 89.83 | 0.007       | 0.001                         | 0.166        |
| 26     | 2,739,339.49 | 257,662.25 | 87.287    | 2,739,339.48 | 257,662.24 | 88.56 | 0.007       | 0.010                         | 1.273        |
| 27     | 2,739,308.55 | 257,697.31 | 84.185    | 2,739,308.55 | 257,697.30 | 84.91 | 0.006       | 0.004                         | 0.725        |
| 28     | 2,739,394.12 | 257,733.30 | 91.372    | 2,739,394.11 | 257,733.29 | 93.93 | 0.006       | 0.007                         | 2.558        |
| 29     | 2,739,418.55 | 257,794.47 | 97.015    | 2,739,418.54 | 257,794.47 | 96.88 | 0.001       | 0.005                         | -0.135       |
|        |              |            |           |              |            |       |             | <b><math>RMSE_{xy}</math></b> | <b>0.104</b> |
|        |              |            |           |              |            |       |             | <b><math>RMSE_z</math></b>    | <b>1.472</b> |
